# Supplementary material for: Experimental phasing with vanadium and application to nucleotide-binding membrane proteins
Source: PubMed Central journal article supplement (PMC7642786; doi:10.1107/s2052252520012312), 2020-10-14
Supplement: m-07-01092-sup1.pdf [file m-07-01092-sup1.pdf]

# IUCrJ

**Volume 7 (2020)**

**Supporting information for article:**

**Experimental phasing with vanadium and application to nucleotide-binding membrane proteins**

**Kamel El Omari, Nada Mohamad, Kiran Bountra, Ramona Duman, Maria Romano, Katja Schlegel, Hok-Sau Kwong, Vitaliy Mykhaylyk, Claus Olesen, Jesper Vuust Moller, Maike Bublitz, Konstantinos Beis and Armin Wagner**

**Table S1** Comparison between processing and phasing statistics of two RNase A datasets collected at  $\lambda = 2.2604 \text{ \AA}$  and  $\lambda = 1.7711 \text{ \AA}$ .

| Data collection                                                                    | RNase A 5485 eV                                             | RNase A 7000 eV                                             |
|------------------------------------------------------------------------------------|-------------------------------------------------------------|-------------------------------------------------------------|
| <b>Beamline</b>                                                                    | DLS-I23                                                     | DLS-I23                                                     |
| <b>Space group</b>                                                                 | C2                                                          | C2                                                          |
| <b>Unit cell (<math>\text{\AA}</math>, <math>^\circ</math>)</b>                    | a=100.4 b=32.9, c=72.5<br>$\alpha=\gamma=90$ , $\beta=90.4$ | a=100.4 b=32.9, c=72.5<br>$\alpha=\gamma=90$ , $\beta=90.4$ |
| <b>Number of degrees, number of crystals</b>                                       | 360 $^\circ$ , 1                                            | 360 $^\circ$ , 1                                            |
| <b>Wavelength (<math>\text{\AA}</math>)</b>                                        | 2.2604                                                      | 1.7711                                                      |
| <b>Resolution (<math>\text{\AA}</math>)</b>                                        | 72.44-1.47 (1.50-1.47)                                      | 72.47-1.30 (1.32-1.30)                                      |
| <b>Number of unique reflections</b>                                                | 34664 (1007)                                                | 54052 (2365)                                                |
| <b>Completeness (%)</b>                                                            | 86.5 (51.0)                                                 | 92.3 (81)                                                   |
| <b>Completeness (%) ellipsoidal</b>                                                |                                                             |                                                             |
| <b>Multiplicity</b>                                                                | 4.2 (2.1)                                                   | 4.6 (4)                                                     |
| <b><math>\langle I/\sigma(I) \rangle</math></b>                                    | 21.3 (2.8)                                                  | 17.8 (1.6)                                                  |
| <b>Rmerge (%)</b>                                                                  | 3.4 (18.8)                                                  | 3.5 (61.7)                                                  |
| <b>Rpim (%)</b>                                                                    | 2.4 (18.8)                                                  | 2.4 (51.4)                                                  |
| <b>CC1/2 highest resolution shell</b>                                              | 0.88                                                        | 0.68                                                        |
| <b>Anomalous completeness</b>                                                      | 77.0 (47.7)                                                 | 84.6 (70.8)                                                 |
| <b>Anomalous multiplicity</b>                                                      | 2.0 (1.1)                                                   | 2.2 (2.1)                                                   |
| <b>Mid-Slope of Anom Normal Probability</b>                                        | 1.59                                                        | 1.19                                                        |
|                                                                                    |                                                             |                                                             |
| <b>Phasing (Crank2)</b>                                                            |                                                             |                                                             |
| <b>Substructure CFOM</b>                                                           | 53.5                                                        | 43.5                                                        |
| <b>Mean phasing FOM</b>                                                            | 0.25                                                        | 0.19                                                        |
| <b>FOM after density modification</b>                                              | 60.8                                                        | 51.3                                                        |
| <b>FOM after initial automatic model building</b>                                  | 0.89                                                        | 0.92                                                        |
| <b>Number of residues built after automatic model building/number of fragments</b> | 246/4                                                       | 239/5                                                       |
| <b>Rwork/Rfree after model building</b>                                            | 27.4/29.6                                                   | 28.7/30.8                                                   |

**Table S2** Vanadium-containing ligands deposited in the PDB as of 2019.

Values in parentheses are the number of membrane proteins complexed with vanadium derivatives.

| Ligand identifier | Ligand name                                                             | Number of PDB Entries (membrane proteins) |
|-------------------|-------------------------------------------------------------------------|-------------------------------------------|
| VO4               | TRIOXIDO-OXO-VANADIUM                                                   | 96 (4)                                    |
| VN4               | OXIDO(DIOXO)VANADIUM                                                    | 12 (1)                                    |
| AOV               | ADP ORTHOVANADATE                                                       | 8 (2)                                     |
| AD9               | ADP METAVANADATE                                                        | 7                                         |
| VN3               | TRIOXOVANADIUM                                                          | 4                                         |
| UVC               | URIDINE-2',3'-VANADATE                                                  | 3                                         |
| V5A               | ADENOSINE-5'-VANADATE                                                   | 3                                         |
| V                 | VANADIUM ION                                                            | 3                                         |
| AVC               | ADENOSINE-5'-MONOPHOSPHATE-2',3'-VANADATE                               | 2                                         |
| V7O               | META VANADATE                                                           | 2                                         |
| V4O               | CYCLO-TETRAMETAVANADATE                                                 | 2 (1)                                     |
| SVA               | SERINE VANADATE                                                         | 1                                         |
| VG1               | ALPHA-D-GLUCOSE-1-PHOSPHATE-6-VANADATE                                  | 1                                         |
| VO3               | TETRAMETAVANADATE                                                       | 1                                         |
| BVA               | TRIHYDROXY[(N-HYDROXYBENZAMIDATO)OXO]VANADATE                           | 1                                         |
| FV1               | DIHYDROXY {[ (2R,3S)-3-METHYLOXIRAN-2-YL]PHOSPHONATO-KAPPAO}OXOVANADIUM | 1                                         |
| AV2               | ADENOSINE-5'-DIPHOSPHATE-2',3'-VANADATE                                 | 1                                         |
| VA3               | TRIVANADATE                                                             | 1                                         |
| 8P8               | C Fe7 S8 V                                                              | 1                                         |
| AIV               | HYDROXY(OXO)BIS(PYRIDINE-2-CARBOXYLATO-KAPPA~2~N,O)VANADIUM(3+)         | 1                                         |
| D6N               | FeV                                                                     | 1                                         |

**Table S3** Effect of the multiplicity on the structure solution of SERCA

12 datasets (360° each) were processed separately and incrementally merged in XSCALE (Kabsch, 2010). The reflection files were converted to mtz files using Aimless (Evans & Murshudov, 2013) and fed to CRANK2 (Skubak & Pannu, 2013). The table shows that at least 4 datasets are necessary to obtain a starting model.

| Number of datasets | Overall SigAno/Anomalous correlation (XSCALE) | Multiplicity (Aimless) | Mean phasing FOM | Density modification FOM | FOM after initial model building | Number of building cycles | % of residues built against sequence/against built |
|--------------------|-----------------------------------------------|------------------------|------------------|--------------------------|----------------------------------|---------------------------|----------------------------------------------------|
| 1                  | 0.84/11                                       | 6.5                    | 0.151            | 48.5                     | 0.51                             | 50                        | 4/4                                                |
| 2                  | 0.89/14                                       | 13                     | 0.144            | 42.1                     | 0.49                             | 50                        | 2/2                                                |
| 3                  | 0.93/17                                       | 19.4                   | 0.148            | 41.5                     | 0.51                             | 50                        | 5/5                                                |
| 4                  | 0.97/19                                       | 25.8                   | 0.164            | 54.2                     | 0.81                             | 22                        | 49/56                                              |
| 5                  | 1.01/21                                       | 32.3                   | 0.173            | 46.5                     | 0.87                             | 41                        | 67/77                                              |
| 6                  | 1.05/23                                       | 38.8                   | 0.175            | 54.1                     | 0.77                             | 15                        | 53/57                                              |
| 7                  | 1.08/25                                       | 45.2                   | 0.196            | 56.4                     | 0.8                              | 14                        | 71/77                                              |
| 8                  | 1.11/27                                       | 51.7                   | 0.192            | 57.6                     | 0.8                              | 14                        | 61/65                                              |
| 9                  | 1.14/30                                       | 58.1                   | 0.175            | 46.9                     | 0.79                             | 16                        | 36/58                                              |
| 10                 | 1.16/30                                       | 64.6                   | 0.192            | 57.3                     | 0.85                             | 17                        | 53/59                                              |
| 11                 | 1.18/30                                       | 71                     | 0.199            | 57.5                     | 0.85                             | 15                        | 40/63                                              |
| 12                 | 1.21/34                                       | 77.4                   | 0.182            | 57.5                     | 0.88                             | 16                        | 58/63                                              |

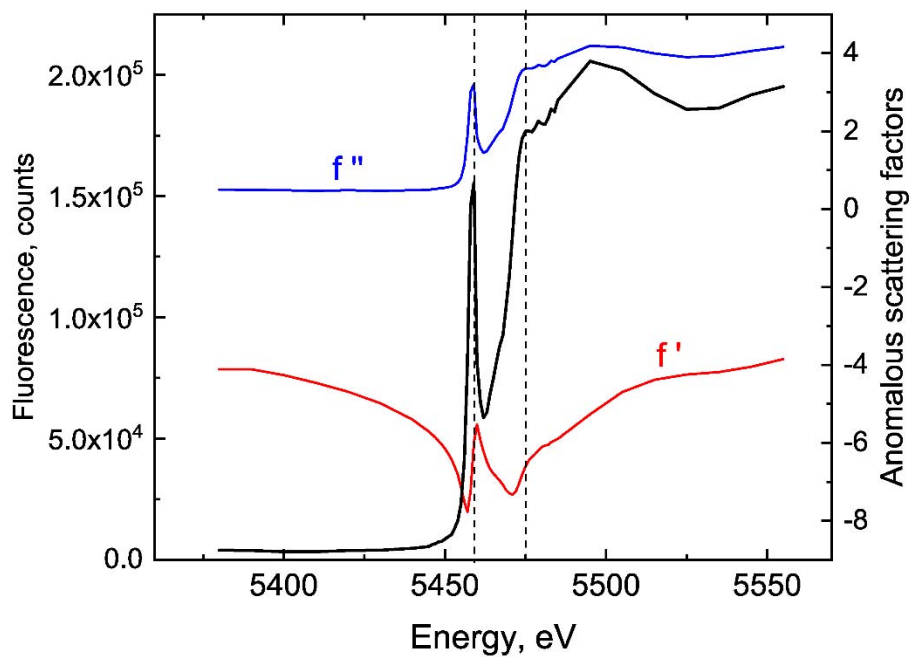

**Figure S1** Vanadium K-edge XAS spectra of sodium ortho-vanadate taken on the Diamond I23 beamline (black line). The dashed lines show the pre-edge peak ( $E = 5459$  eV) and the peak ( $E = 5475$  eV) with  $f_0 = 23 e^-$ ,  $f'' = -6.6 e^-$  and  $f' = 3.6 e^-$  as determined by CHOOCH (Evans & Pettifer, 2001).

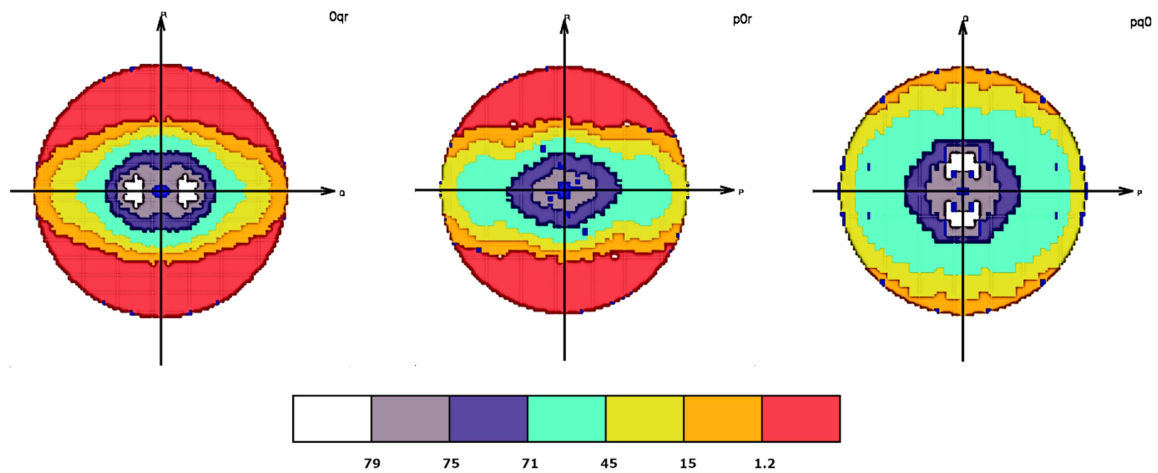

**Figure S2** Intensity data in 3D reciprocal space for McjD. The local mean value of  $I/\sigma(I)$  for each reciprocal lattice point within the sphere of observation is calculated by STARANISO and colour-coded: the blue points represent unobserved data, the red points represent observed data falling below the  $1.2\sigma$  threshold for cut-off, and the other colours represent successively higher values of the mean  $I/\sigma(I)$  as shown by the colour bar.

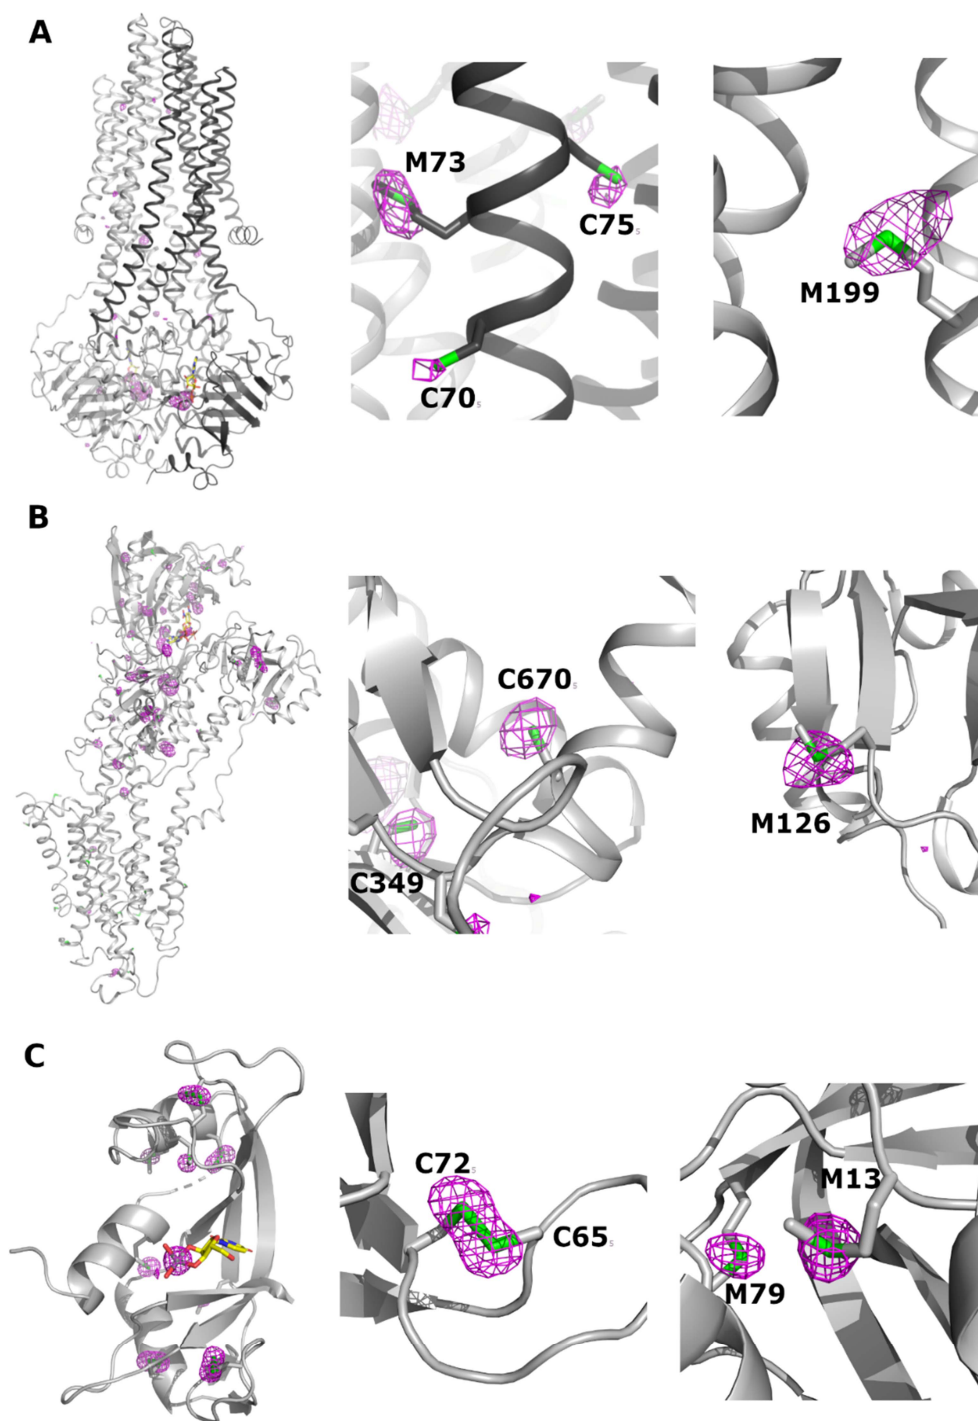

**Figure S3** Examples of peaks in phased anomalous difference maps corresponding to sulphur atoms (magenta) calculated with ANODE (Thorn & Sheldrick, 2011). McjD (A), SERCA (B) and RNase A (C) sulphur peaks are contoured at 3.5, 5 and 3.5  $\sigma$  respectively.
